# Supplementary material
Source: PubMed Central journal article supplement (PMC9141682)
Supplement: mmc1.pdf [file mmc1.pdf]

# THE LANCET Microbe

## Supplementary appendix

This appendix formed part of the original submission and has been peer reviewed.  
We post it as supplied by the authors.

Supplement to: Muecksch F, Wise H, Templeton K, et al. Longitudinal variation in SARS-CoV-2 antibody levels and emergence of viral variants: a serological analysis. *Lancet Microbe* 2022; published online May 27. [https://doi.org/10.1016/S2666-5247\(22\)00090-8](https://doi.org/10.1016/S2666-5247(22)00090-8).

## **Appendix methods, figures and legends for**

### **Longitudinal variation in SARS-CoV-2 antibody levels and emergence of viral variants: implications for the ability of serological assays to predict immunity.**

Index:

Appendix Methods, pages 2-3

Appendix Figure 1, page 4

Appendix Figure 2, page 5

Appendix Figure 3, page 6

Appendix Figure 4, page 7

Appendix Figure 5, pages 8-9

Appendix Table 1, pages 10-14

## Appendix Methods

### Study design and participants

This study is an observational cohort study and no statistical methods were used to predetermine sample size. Individuals with a positive SARS-CoV-2 PCR result were contacted by telephone by a research nurse and offered the opportunity to enrol in the study. Further recruitment took place by email advert. To enroll, participants must have been over 18 and had PCR confirmed SARS-CoV-2 infection at least 21 days prior. Exclusion criteria included individuals who were frail or shielding. At the baseline visit, participants consent was obtained together with a completed questionnaire detailing their symptoms and any hospitalization (see appendix Table 1). Serum samples were collected. Patients were invited to attend subsequent visits at approximately 2, 4, 8 and 20 weeks later. The final sample sizes were based on how many participants could be recruited for blood donation at each visit. Routine PCR testing was not available and therefore we cannot exclude that the one patient showing significantly increased neutralizing titers over time (Figure 1A) was not re-infected. As this is an observational study, experiments were not randomized, and the investigators were not blinded to allocation during experiments and outcome assessment.

### Determination of assay sensitivity and specificity relative to neutralizing antibody titers (NT50).

The sensitivity and specificity of the antibody assays to detect samples with neutralising antibody titres was determined. An NT50 of  $>50$  was selected as being above the limit of detection in the neutralization assay. Samples were assigned as true positive (TP) if the sample had an NT50  $> 50$ , and an antibody assay value above the threshold. They were assigned as false negative (FN) if the sample had an NT50  $> 50$  but had a result below the threshold in the antibody assay, as false positive (FP) if the sample had an NT50  $< 50$  but had an antibody assay result above the threshold and as true negative (TN) if the sample had an NT50  $< 50$  and a negative result in the antibody assay. Sensitivity (% Sens) was calculated as  $[TP/(TP+FN)]*100$  and measures the percentage of samples with an NT50  $> 50$  that had a positive antibody result. The total number of samples tested ( $n$ ) is also shown. Specificity (% Spec) was calculated as  $[TN/(TN+FP)]*100$  and measures the percentage of samples with an NT50  $< 50$  with a negative antibody result. The positive predictive value (% PPV) was calculated using the formula  $[TP/(TP+FP)]*100$  and measures the percentage of samples with a positive antibody result and an NT50  $>50$ . The negative predictive value (% NPV) was calculated using the formula  $[TN/(TN+FN)]*100$  and measures the percentage of samples with a negative antibody result and an NT50  $< 50$ . These values were calculated for each assay at the manufacturer's recommended threshold (given in the first row for each manufacturer, and using assay specific units). For some assays the FDA recommended cut off for convalescent plasma donations was also available, and this is shown in a second row for the assay. Clopper-Pearson confidence intervals were used. As the cPass assay is not intended as a diagnostic assay with a specific cutoff value, this assay was not included in this analysis. We note, that given that the sample size is small, the power of the study to assess differences between tests may be limited.

### Statistical analysis of antibody levels over time

A four-parameter nonlinear regression using the least squares regression method without weighting (GraphPad Prism) was used to calculate the half-maximal neutralization titers for sera (NT<sub>50</sub>). This method allows the consideration of four parameters, the upper and lower plateau of the curve, the Hill slope and the 50% inhibitory dilution (i.e. the NT50). The upper plateau was constrained to 1 and the lower to 0 representing 100% and 0% infection, respectively. For each individual study participant, assay values (either neutralizing titers or serological assay values) were normalized to the value obtained at visit 1 resulting in all values expressed as % of visit 1. Next, we analyzed whether assay values differ significantly between visit 1 and 5. To account for the longitudinal character of the dataset, we applied the two-tailed Wilcoxon matched-pairs signed rank test with a Confidence level of 95% and P values were reported.

### Statistical analysis of neutralizing titer decay-rates over time

The relative decay in neutralizing titers that occurred between visit 1 and 3 was compared to the decay in neutralizing titers that occurred between visit 3 and 5. Only paired samples were taken into consideration, i.e. only participants that donated blood at visit 1, 3 and 5 were included in this analysis, to allow for calculation of the decay-rate between those visits. As a result, the two-tailed, nonparametric paired Wilcoxon matched-pairs signed rank test was used to analyze whether the decay rate differed between early after infection and late after infection. Confidence level was set at 95%.

**Statistical analysis of variant of concern neutralization titers over time**

The neutralization titer for individual variants of concern was assessed in paired samples obtained at visit 1 and visit 5. All values were normalized to neutralization of the corresponding WT control (R683G) and values are expressed as NT50 relative to wt (%). Statistical significance of values obtained at visit 1 and visit 5 was calculated using the nonparametric paired Wilcoxon matched pairs signed rank test conducted at a confidence level of 95. Two-tailed P values are reported.

**Statistical analysis of differences between male and female study participants**

Differences in neutralization titers obtained in male vs. female study participants were analyzed using the nonparametric unpaired Mann-Whitney test and subsequent Dunn's multiple comparisons test at a confidence level of 95%. Two-tailed P values are reported.

**Correlation analyses**

Correlation between Neutralizing titers and individual serology assays was assessed by calculating the nonparametric Spearman correlation coefficient. Tests were conducted at a confidence level of 95% and Spearman  $r$  with 95% confidence intervals, as well as two-tailed P values, as indicated, were reported. Correlation analyses were always performed for the individual timepoints, as indicated. A heat map was used to visualize those values in addition to correlation diagrams.

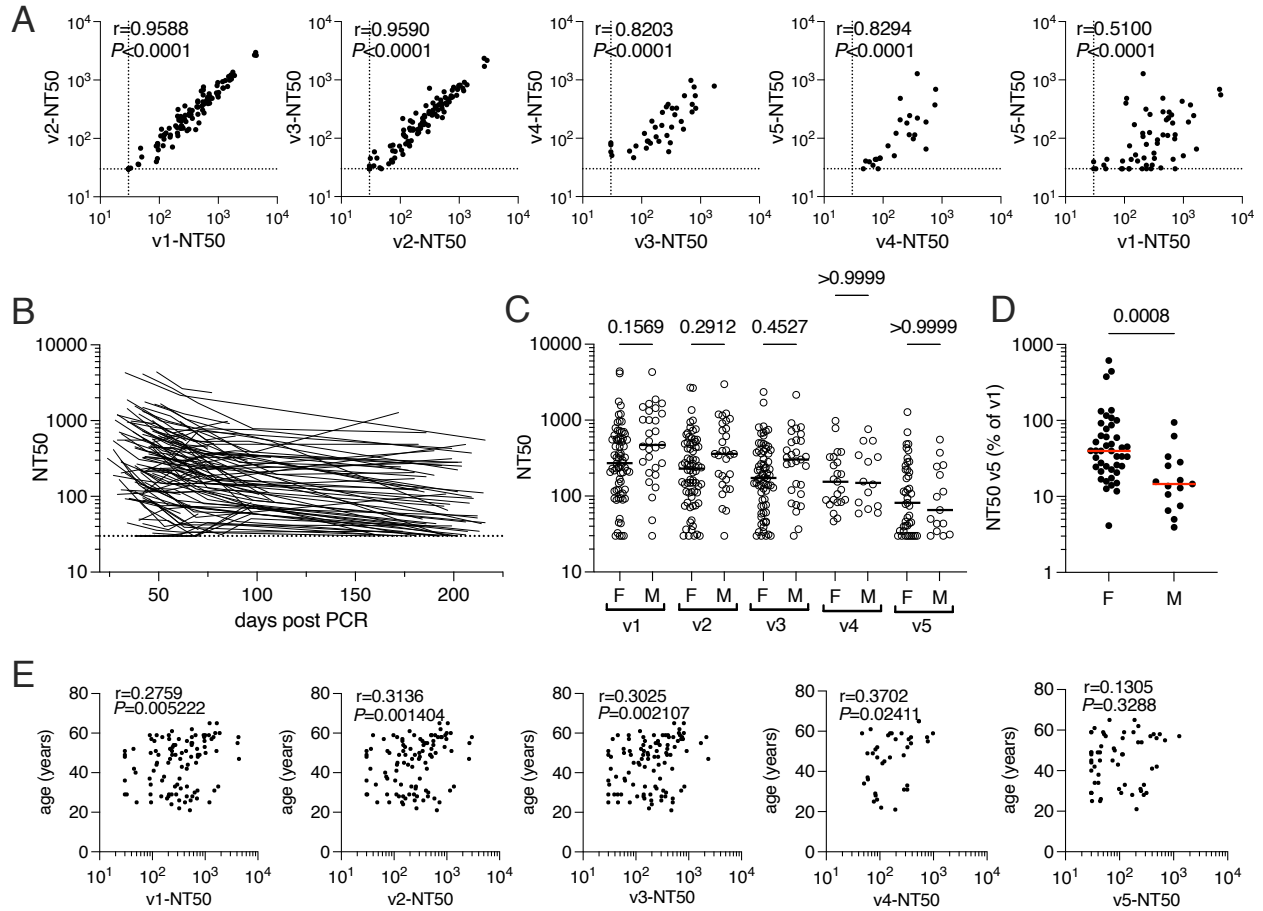

**Appendix figure 1 – Correlation of neutralization activity and demographic parameters. (A)** Correlation of NT50s in samples collected at different timepoints. **(B)** NT50 values per patient over time with each line representing a single participant. **(C)** NT50 values in female and male participants, sampled at the indicated visit. Statistical significance was assessed with the unpaired Kruskal-Wallis test with subsequent Dunn’s multiple comparisons test. **(D)** Relative NT50 values at visit 5, normalized to visit 1 for female and male participants. Statistical significance was assessed with the Mann-Whitney test. **(E)** Correlation of NT50 and age at the indicated timepoints. Statistical significance in (A) and (E) was determined using the Spearman correlation test. Spearman  $r$ - and respective  $P$ -values as indicated. Dotted lines in (A) and (B) indicate limit of detection.

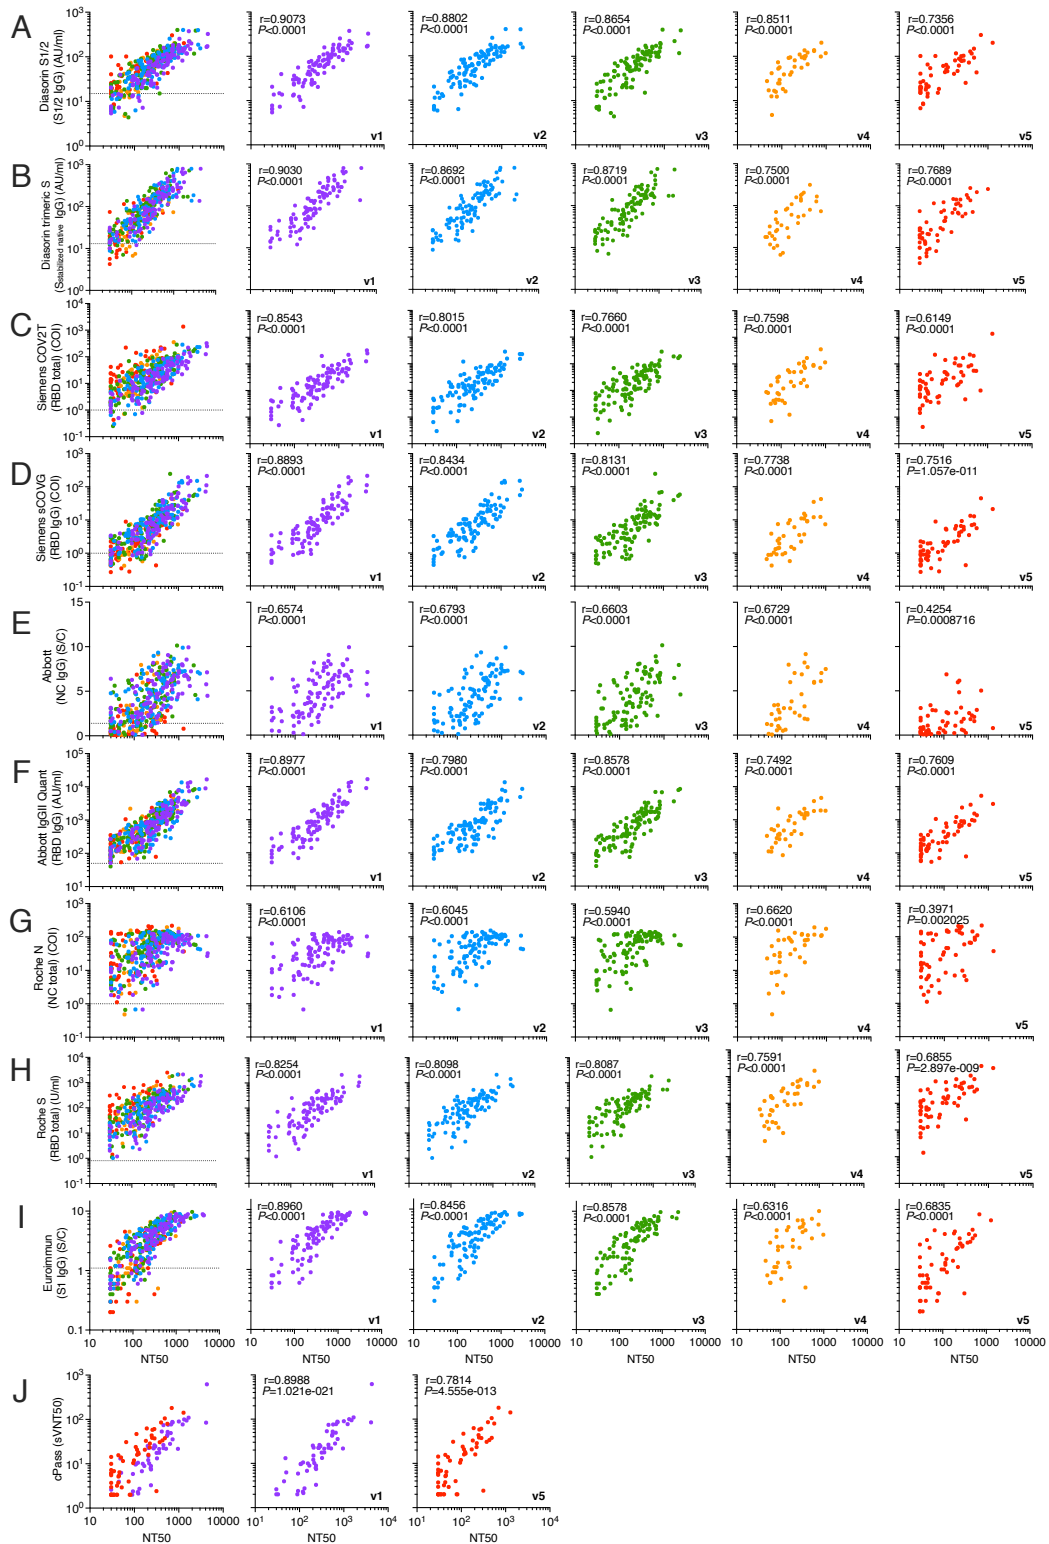

**Appendix figure 2 – Correlation of neutralization titers and serology assays per visit. (A-J)** Correlation of NT50 (x-axis) and indicated serological assay measurements (y axis) at visit 1 through 5. Sampling timepoints are indicated by color and shown collectively (left) and individually. Statistical significance was determined using the Spearman correlation test and Spearman  $r$ - and respective  $P$ -values are indicated for the individual visits. Dotted lines in left panels indicate serological assay thresholds.

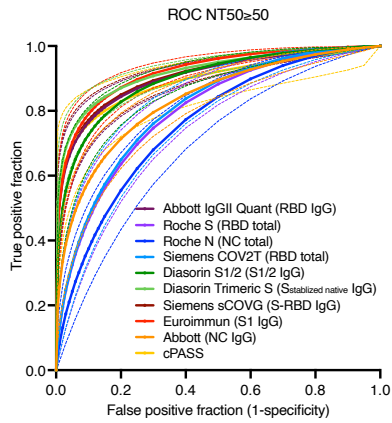

|                     | AOC    |
|---------------------|--------|
| Abbott NC IgG       | 0.8332 |
| Diasorin S1/2 IgG   | 0.8958 |
| Siemens COV2T       | 0.8068 |
| Roche NC            | 0.7576 |
| Roche S-RBD         | 0.7985 |
| Euroimmun S1 IgG    | 0.9184 |
| Diasorin Trimeric S | 0.9203 |
| Abbott IgGII S IgG  | 0.9067 |
| Siemens sCOVG       | 0.9033 |
| cPass               | 0.891  |

**Appendix figure 3 – ROC analysis.** Receiver-operating characteristic curve (ROC) for prediction of NT50>50 based on results obtained with indicated serology assays. Shown are mean values (continuous lines), 95% confidence intervals (dotted lines) and area under the curve (AOC) (table).

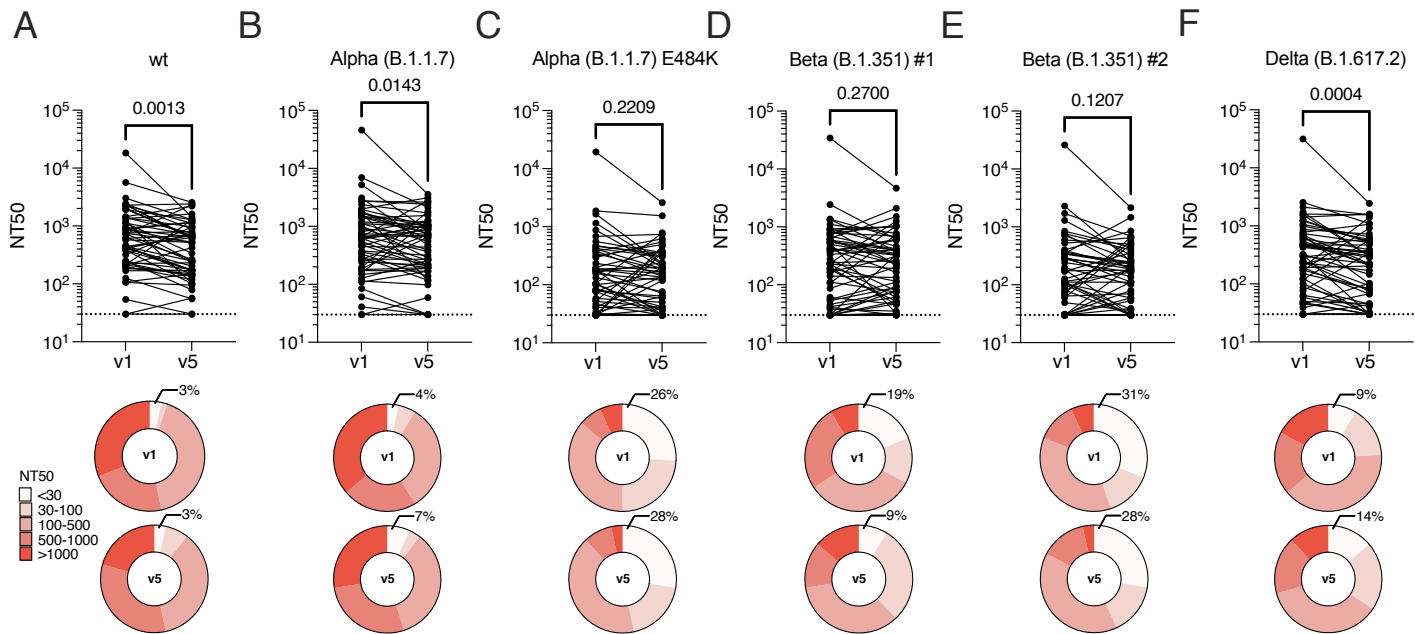

**Appendix figure 4 – Neutralization of variants of concern.** NT50s for wt (A) B.1.1.7 (B), Alpha (B.1.1.7) E484K (C), Beta (B.1.351) #1 (D), Beta (B.1.351) #2 (E) and Delta (B.1.617.2) (F) pseudovirus at visit 1 and visit 5. Statistical significance was determined using Wilcoxon test. Dotted line indicates limit of detection. Deletions/substitutions present in VOCs, as well as respective wt control are in R683G background, as indicated.



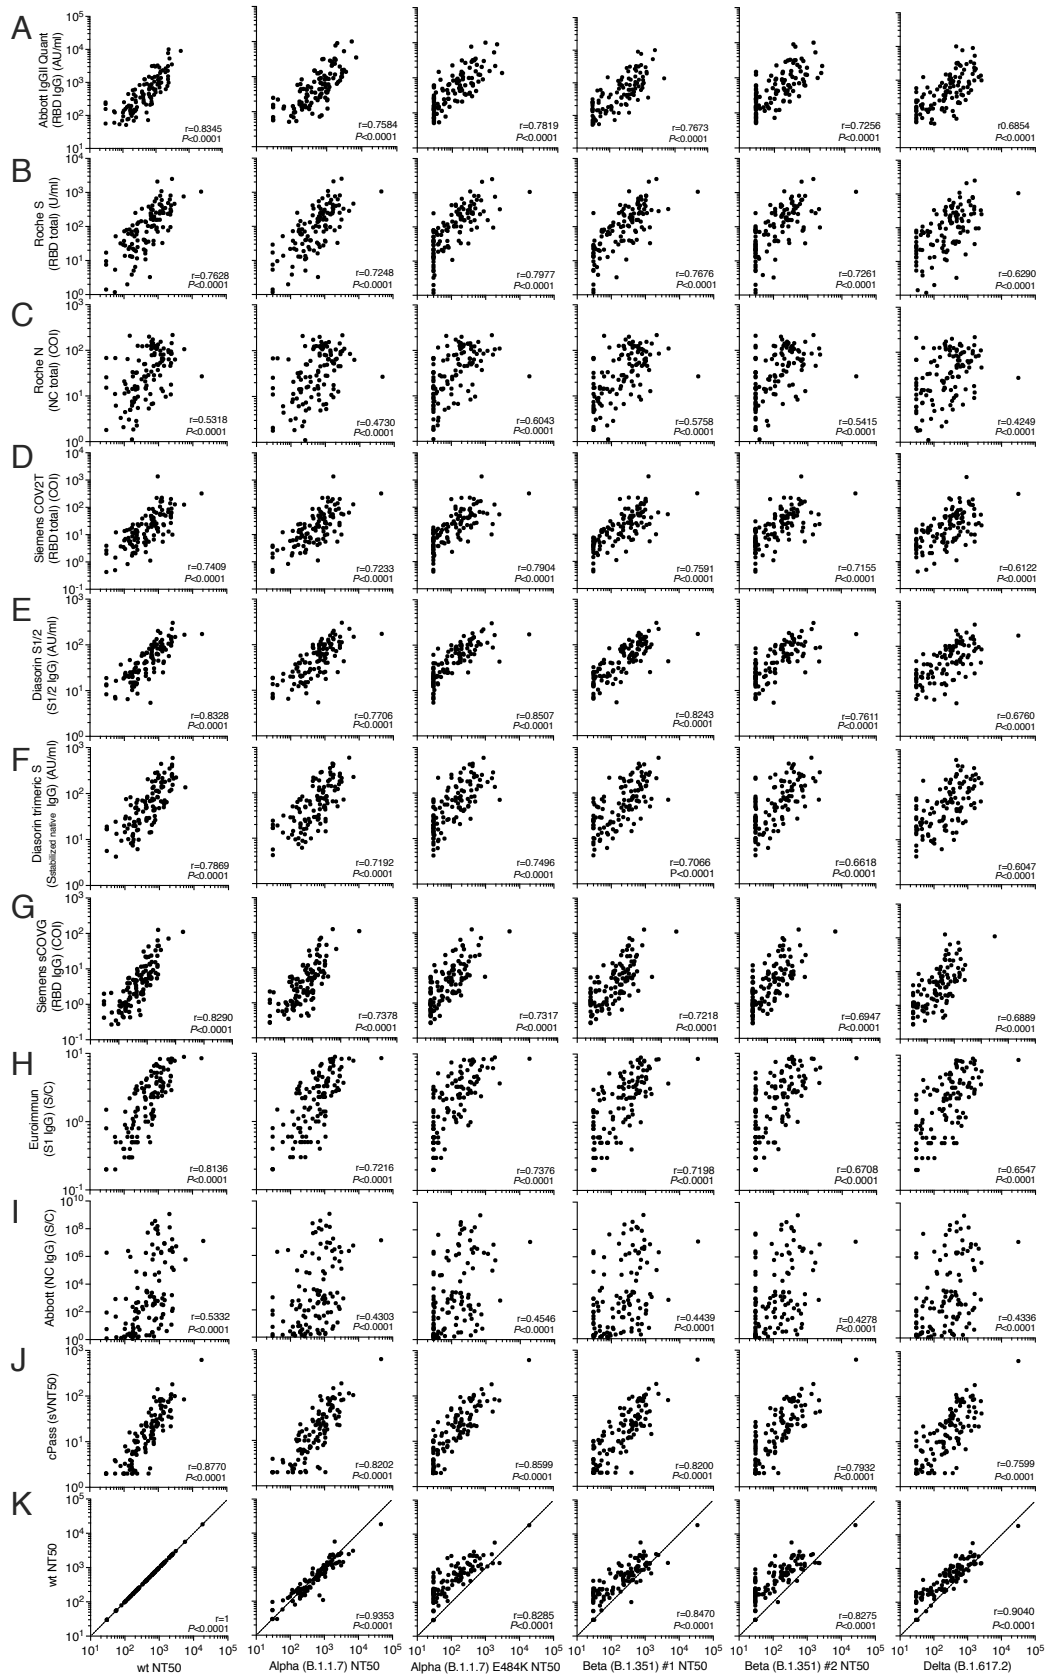

**Appendix figure 5 – Neutralization of variants of concern versus serology assays. (A-K)** Correlation of, from left to right NT50s against the indicated pseudoviruses with the Abbott IgGII Quant **(A)**, Roche S **(B)**, Roche N **(C)**, Siemens COV2T **(D)**, Diasorin S1/2 **(E)**, Diasorin Trimeric S **(F)**, Siemens sCOVG **(G)**, Euroimmun **(H)**, Abbott NC **(I)** and the cPass assay **(J)** as well as with wt NT50 values. Samples obtained at visit 1 and visit 5 are included. Statistical significance was determined using the Spearman correlation, with Spearman r- and respective P-values as indicated. Deletions/substitutions present in VOCs, as well as respective wt control are in R683G background.

**Table 1. Ability of serological assays to qualitatively identify presence of neutralizing antibodies.**

| >=50 - VISIT 1      | cut off | TP | FN | TN | FP | test positive | test negative | n   | Sensitivity |          |          | Specificity |          |          | PPV  |          |          | NPV  |          |          |
|---------------------|---------|----|----|----|----|---------------|---------------|-----|-------------|----------|----------|-------------|----------|----------|------|----------|----------|------|----------|----------|
|                     |         |    |    |    |    |               |               |     | %SENS       | lower CI | upper CI | %SPEC       | lower CI | upper CI | %PPV | lower CI | upper CI | %NPV | lower CI | upper CI |
| Abbott NC IgG       | >=1.4   | 88 | 4  | 3  | 6  | 94            | 7             | 101 | 96          | 89.2     | 98.5     | 33          | 7.5      | 65.5     | 94   | 86.6     | 97.2     | 43   | 9.9      | 77.5     |
|                     | >=4.5   | 54 | 38 | 8  | 1  | 55            | 46            | 101 | 59          | 47.9     | 67.4     | 89          | 51.8     | 99.4     | 98   | 90.3     | 99.9     | 17   | 7.8      | 29.2     |
| Diasorin S1/2 IgG   | >=15    | 87 | 5  | 8  | 1  | 88            | 13            | 101 | 95          | 87.8     | 97.8     | 89          | 51.8     | 99.4     | 99   | 93.8     | 99.9     | 62   | 31.6     | 83.4     |
| Siemens COV2T       | >=1     | 91 | 1  | 2  | 7  | 98            | 3             | 101 | 99          | 94.1     | 99.9     | 22          | 2.8      | 55.0     | 93   | 85.8     | 96.6     | 67   | 9.4      | 98.3     |
|                     | >=4.8   | 82 | 10 | 9  | 0  | 82            | 19            | 101 | 89          | 80.9     | 94.0     | 100         | 66.4     | 100.0    | 100  | 95.6     | 100.0    | 47   | 24.4     | 68.0     |
| Roche NC            | >=1     | 91 | 1  | 0  | 9  | 100           | 1             | 101 | 99          | 94.1     | 99.9     | 0           | n.a.     | 28.3     | 91   | 83.6     | 95.2     | 0    | n.a.     | 95.0     |
| Roche S-RBD         | >=0.8   | 92 | 0  | 0  | 9  | 101           | 0             | 101 | 100         | 96.1     | 100.0    | 0           | n.a.     | 28.3     | 91   | 83.8     | 95.3     | n.a. | n.a.     | n.a.     |
|                     | >=132   | 44 | 48 | 9  | 0  | 44            | 57            | 101 | 48          | 37.3     | 56.9     | 100         | 66.4     | 100.0    | 100  | 92.0     | 100.0    | 16   | 7.5      | 25.9     |
| Euroimmun S1 IgG    | >=1.1   | 85 | 5  | 7  | 2  | 87            | 12            | 99  | 94          | 84.9     | 96.4     | 78          | 40.0     | 95.9     | 98   | 91.9     | 99.6     | 58   | 27.7     | 81.9     |
|                     | >=3.5   | 55 | 35 | 9  | 0  | 55            | 44            | 99  | 61          | 49.0     | 68.4     | 100         | 66.4     | 100.0    | 100  | 93.5     | 100.0    | 20   | 9.8      | 33.0     |
|                     | >=6     | 28 | 62 | 9  | 0  | 28            | 71            | 99  | 31          | 21.3     | 39.3     | 100         | 66.4     | 100.0    | 100  | 87.7     | 100.0    | 13   | 6.0      | 21.1     |
|                     | >=8     | 14 | 76 | 9  | 0  | 14            | 85            | 99  | 16          | 8.6      | 22.8     | 100         | 66.4     | 100.0    | 100  | 76.8     | 100.0    | 11   | 5.0      | 17.7     |
| Diasorin Trimeric S | >= 13   | 90 | 1  | 1  | 8  | 98            | 2             | 100 | 99          | 92.4     | 99.6     | 11          | 0.3      | 42.9     | 92   | 84.5     | 95.9     | 50   | 1.3      | 97.5     |
| Abbott IgGII S IgG  | >=50    | 90 | 0  | 0  | 9  | 99            | 0             | 99  | 100         | 92.4     | 99.6     | 0           | n.a.     | 28.3     | 91   | 83.4     | 95.2     | n.a. | n.a.     | n.a.     |
|                     | >=500   | 64 | 26 | 9  | 0  | 64            | 35            | 99  | 71          | 59.1     | 77.4     | 100         | 66.4     | 100.0    | 100  | 94.4     | 100.0    | 26   | 12.5     | 40.6     |
| Siemens sCOVG       | >=1     | 88 | 3  | 3  | 6  | 94            | 6             | 100 | 97          | 89.2     | 98.5     | 33          | 7.5      | 65.5     | 94   | 86.6     | 97.2     | 50   | 11.8     | 84.7     |
|                     | >=4.8   | 64 | 27 | 9  | 0  | 64            | 36            | 100 | 70          | 59.1     | 77.4     | 100         | 66.4     | 100.0    | 100  | 94.4     | 100.0    | 25   | 12.1     | 39.6     |
| cPASS (sVNT50)      | ≥2      | 35 | 0  | 0  | 5  | 58            | 0             | 58  | 100         | 46.9     | 66.3     | 0           | n.a.     | 28.3     | 91   | 81.0     | 96.5     | n.a. | n.a.     | n.a.     |
|                     | ≥10     | 39 | 14 | 5  | 0  | 39            | 19            | 58  | 74          | 32.1     | 51.5     | 100         | 21.2     | 83.1     | 100  | 91.0     | 100.0    | 26   | 9.1      | 47.6     |
| NEUT                | >=50    | 92 | 0  | 9  | 0  | 92            | 9             | 101 | 100         |          |          | 100         |          |          | 100  |          |          | 100  |          |          |

| >=50 - VISIT 5      | cut off | TP | FN | TN | FP | test positive | test negative | n  | Sensitivity |          |          | Specificity |          |          | PPV  |          |          | NPV  |          |          |
|---------------------|---------|----|----|----|----|---------------|---------------|----|-------------|----------|----------|-------------|----------|----------|------|----------|----------|------|----------|----------|
|                     |         |    |    |    |    |               |               |    | %SENS       | lower CI | upper CI | %SPEC       | lower CI | upper CI | %PPV | lower CI | upper CI | %NPV | lower CI | upper CI |
| Abbott NC IgG       | >=1.4   | 29 | 16 | 28 | 8  | 37            | 44            | 81 | 64          | 48.8     | 76.3     | 78          | 60.8     | 88.4     | 78   | 61.8     | 88.8     | 64   | 47.8     | 75.7     |
|                     | >=4.5   | 7  | 38 | 36 | 0  | 7             | 74            | 81 | 16          | 6.5      | 27.2     | 100         | 90.3     | 100.0    | 100  | 59.0     | 100.0    | 49   | 36.9     | 58.8     |
| Diasorin S1/2 IgG   | >=15    | 41 | 0  | 9  | 27 | 68            | 9             | 77 | 100         | 78.8     | 96.9     | 25          | 12.1     | 39.6     | 60   | 47.7     | 70.3     | 100  | 66.4     | 100.0    |
| Siemens COV2T       | >=1     | 45 | 0  | 3  | 33 | 78            | 3             | 81 | 100         | 92.1     | 100.0    | 8           | 1.8      | 20.2     | 58   | 46.0     | 67.2     | 100  | 29.2     | 100.0    |
|                     | >=4.8   | 42 | 3  | 10 | 26 | 68            | 13            | 81 | 93          | 81.7     | 98.2     | 28          | 14.2     | 42.5     | 62   | 49.2     | 71.6     | 77   | 46.2     | 93.4     |
| Roche NC            | >=1     | 45 | 0  | 2  | 34 | 79            | 2             | 81 | 100         | 92.1     | 100.0    | 6           | 0.7      | 16.5     | 57   | 45.3     | 66.4     | 100  | 15.8     | 100.0    |
| Roche S-RBD         | >=0.8   | 45 | 0  | 2  | 34 | 79            | 2             | 81 | 100         | 92.1     | 100.0    | 6           | 0.7      | 16.5     | 57   | 45.3     | 66.4     | 100  | 15.8     | 100.0    |
|                     | >=132   | 35 | 10 | 28 | 8  | 43            | 38            | 81 | 78          | 62.9     | 87.4     | 78          | 60.8     | 88.4     | 81   | 66.6     | 90.4     | 74   | 56.9     | 85.0     |
| Euroimmun S1 IgG    | >=1.1   | 37 | 8  | 27 | 9  | 46            | 35            | 81 | 82          | 67.9     | 90.8     | 75          | 57.8     | 86.3     | 80   | 66.1     | 89.4     | 77   | 59.9     | 88.1     |
|                     | >=3.5   | 18 | 27 | 36 | 0  | 18            | 63            | 81 | 40          | 25.7     | 53.3     | 100         | 90.3     | 100.0    | 100  | 81.5     | 100.0    | 57   | 44.0     | 67.8     |
|                     | >=6     | 4  | 41 | 36 | 0  | 4             | 77            | 81 | 9           | 2.5      | 19.2     | 100         | 90.3     | 100.0    | 100  | 39.8     | 100.0    | 47   | 35.3     | 56.7     |
|                     | >=8     | 1  | 44 | 36 | 0  | 1             | 80            | 81 | 2           | 0.1      | 10.1     | 100         | 90.3     | 100.0    | 100  | 2.5      | 100.0    | 45   | 33.8     | 54.8     |
| Diasorin Trimeric S | >= 13   | 43 | 2  | 13 | 23 | 66            | 15            | 81 | 96          | 84.9     | 99.2     | 36          | 20.8     | 51.2     | 65   | 52.4     | 74.9     | 87   | 59.5     | 97.6     |
| Abbott IgGII S IgG  | >=50    | 45 | 0  | 2  | 34 | 79            | 2             | 81 | 100         | 92.1     | 100.0    | 6           | 0.7      | 16.5     | 57   | 45.3     | 66.4     | 100  | 15.8     | 100.0    |
|                     | >=500   | 30 | 15 | 33 | 3  | 33            | 48            | 81 | 67          | 51.0     | 78.2     | 92          | 77.5     | 97.7     | 91   | 75.7     | 97.5     | 69   | 53.7     | 79.6     |
| Siemens sCOVG       | >=1     | 41 | 4  | 21 | 15 | 56            | 25            | 81 | 91          | 78.8     | 96.9     | 58          | 40.8     | 72.3     | 73   | 59.7     | 82.7     | 84   | 63.9     | 94.3     |
|                     | >=4.8   | 24 | 21 | 36 | 0  | 24            | 57            | 81 | 53          | 37.9     | 66.2     | 100         | 90.3     | 100.0    | 100  | 85.8     | 100.0    | 63   | 49.3     | 73.8     |
| cPASS (sVNT50)      | ≥2      | 35 | 0  | 0  | 23 | 58            | 0             | 58 | 100         | 62.9     | 87.4     | 0           | n.a.     | 8.0      | 60   | 46.6     | 71.2     | n.a. | n.a.     | n.a.     |
|                     | ≥10     | 30 | 5  | 21 | 2  | 32            | 26            | 58 | 86          | 51.0     | 78.2     | 91          | 40.8     | 72.3     | 94   | 79.2     | 98.9     | 81   | 60.6     | 92.1     |
| NEUT                | >=50    | 45 | 0  | 36 | 0  | 45            | 36            | 81 | 100         |          |          | 100         |          |          | 100  |          |          | 100  |          |          |

True and false positive and negative samples are defined based on corresponding antibody neutralization titers: TP, true positives are samples that score positive in each assay and have NT50 >50 (the limit of detection in the neutralization assay). FN, false negatives score negative in serological assays but have NT50>50. TN, true negatives score negative in serological assays and have NT50<50. FP, false positives score positive in serological assays but have NT50<50. %SENS, sensitivity measured as the ration of TP over samples with NT50>50. %SPEC, specificity measured as the ratio of TN over samples that with NT50<50. %PPV, positive predictive value is the ratio of TP over total positive serological assay results. %NPV, negative predictive value is the ratio of TN over total negative serological assay results. (For details see appendix methods.) For each assay, cut off values are in assay units with the top row recommended by the manufacturer (MN) and the bottom by the FDA (when available). CI row indicates lower and upper confidence intervals.

Appendix Table 1: Study participant characteristics

| Patient ID | age | gender | hospitalization | visit 1 | visit 2 | visit 3 | visit 4 | visit 5 | single visit | Symptoms |       |                |         |         |        |                  |                     |
|------------|-----|--------|-----------------|---------|---------|---------|---------|---------|--------------|----------|-------|----------------|---------|---------|--------|------------------|---------------------|
|            |     |        |                 |         |         |         |         |         |              | fever    | cough | muscular aches | anosmia | coryzal | throat | gastrointestinal | shortness of breath |
| 1          | 25  | M      | Y               | 34      | 49      | 62      |         | 199     |              | Y        | N     | N              | Y       | N       | Y      | Y                | N                   |
| 2          | 58  | F      | N               | 33      | 48      | 61      |         | 216     |              | Y        | Y     | N              | N       | N       | N      | N                | N                   |
| 3          | 58  | F      | N               | 33      | 47      | 61      |         |         |              | Y        | Y     | N              | Y       | N       | Y      | N                | Y                   |
| 5          | 36  | M      | N               | 31      | 44      | 59      |         | 214     |              | Y        | N     | Y              | Y       | N       | N      | N                | N                   |
| 6          | 28  | M      | N               | 33      | 46      | 61      |         |         |              | Y        | N     | Y              | Y       | N       | N      | N                | Y                   |
| 7          | 25  | F      | N               | 29      | 42      | 57      |         | 190     |              | Y        | N     | N              | Y       | N       | N      | N                | Y                   |
| 9          | 21  | M      | N               | 24      | 42      | 66      |         | 212     |              | Y        | Y     | Y              | Y       | N       | Y      | N                | N                   |
| 10         | 27  | F      | N               | 30      | 43      | 58      |         | 199     |              | Y        | Y     | Y              | Y       | N       | Y      | N                | Y                   |
| 12         | 28  | F      | N               | 27      | 40      | 55      |         | 206     |              | Y        | Y     | Y              | Y       | N       | Y      | N                | N                   |
| 13         | 43  | M      | N               | 28      | 41      | 56      |         |         |              | N        | Y     | N              | N       | N       | N      | N                | Y                   |
| 14         | 25  | M      | N               | 27      | 40      | 55      |         |         |              | N        | Y     | N              | Y       | N       | Y      | N                | N                   |
| 15         | 29  | M      | N               | 31      | 44      | 59      |         | 213     |              | Y        | Y     | Y              | N       | Y       | Y      | Y                | Y                   |
| 17         | 60  | F      | N               | 27      | 40      | 55      |         | 215     |              | Y        | Y     | Y              | Y       | Y       | N      | N                | Y                   |
| 18         | 48  | M      | N               | 38      | 51      | 66      |         |         |              | Y        | Y     | Y              | N       | N       | Y      | N                | Y                   |
| 19         | 51  | M      | N               | 42      | 55      | 70      |         |         |              | N        | Y     | N              | Y       | Y       | Y      | N                | N                   |
| 20         | 57  | M      | N               | 36      | 49      | 64      |         |         |              | Y        | N     | Y              | Y       | N       | N      | N                | N                   |
| 21         | 53  | F      | N               | 33      | 46      | 61      |         |         |              | Y        | Y     | Y              | N       | N       | Y      | N                | Y                   |
| 22         | 55  | F      | N               | 38      | 51      | 66      |         |         |              | Y        | N     | Y              | N       | N       | N      | Y                | Y                   |
| 23         | 36  | F      | N               | 42      | 55      | 70      |         | 196     |              | Y        | Y     | Y              | Y       | Y       | Y      | N                | Y                   |
| 24         | 56  | M      | N               | 38      | 51      | 66      |         | 212     |              | Y        | N     | Y              | Y       | Y       | N      | N                | Y                   |
| 25         | 58  | M      | N               | 34      | 47      | 62      |         |         |              | Y        | Y     | Y              | Y       | Y       | Y      | N                | Y                   |
| 26         | 60  | F      | N               | 35      | 48      | 63      |         |         |              | Y        | Y     | Y              | Y       | N       | N      | N                | Y                   |
| 27         | 26  | F      | N               | 40      | 53      | 68      |         | 192     |              | Y        | Y     | Y              | Y       | Y       | N      | N                | Y                   |
| 28         | 52  | F      | N               | 37      | 52      | 65      | 93      | 209     |              | Y        | Y     | Y              | Y       | N       | Y      | N                | Y                   |
| 29         | 31  | F      | N               | 39      | 54      | 67      |         |         |              | Y        | N     | Y              | Y       | Y       | Y      | N                | Y                   |
| 30         | 24  | F      | N               | 43      | 58      | 71      |         |         |              | N        | Y     | Y              | Y       | Y       | N      | N                | Y                   |
| 31         | 41  | F      | N               | 29      | 44      | 57      | 85      | 177     |              | Y        | Y     | Y              | Y       | N       | N      | N                | Y                   |
| 32         | 51  | F      | N               | 40      | 55      | 68      | 99      | 191     |              | N        | N     | N              | Y       | N       | Y      | Y                | N                   |
| 33         | 57  | M      | N               | 38      | 53      | 69      | 97      | 185     |              | Y        | Y     | Y              | Y       | N       | Y      | Y                | N                   |
| 34         | 49  | F      | N               | 30      | 45      | 58      | 107     |         |              | Y        | Y     | Y              | N       | Y       | Y      | Y                | Y                   |
| 35         | 56  | F      | N               | 42      | 55      | 70      | 98      | 209     |              | Y        | N     | Y              | N       | N       | N      | N                | N                   |
| 36         | 51  | M      | N               | 38      | 52      | 66      |         |         |              | N        | Y     | N              | Y       | N       | N      | Y                | Y                   |

|    |    |   |   |    |    |    |     |     |  |   |   |   |   |   |   |   |   |
|----|----|---|---|----|----|----|-----|-----|--|---|---|---|---|---|---|---|---|
| 37 | 49 | F | N | 38 | 51 | 66 | 94  | 185 |  | N | N | Y | Y | N | N | N | N |
| 38 | 29 | F | N | 38 | 51 | 66 |     |     |  | Y | Y | Y | Y | Y | Y | N | Y |
| 39 | 58 | F | Y | 51 | 64 | 79 | 107 | 197 |  | Y | Y | N | N | N | N | N | Y |
| 40 | 54 | F | N | 41 | 54 | 69 | 97  |     |  | N | Y | Y | Y | N | Y | N | Y |
| 41 | 65 | F | N | 38 | 51 | 66 |     |     |  | N | Y | Y | N | N | N | N | Y |
| 42 | 55 | F | N | 42 | 57 | 70 | 98  | 206 |  | Y | Y | N | N | N | N | N | Y |
| 43 | 59 | M | N | 45 | 60 | 82 | 97  | 188 |  | Y | Y | Y | Y | N | N | N | Y |
| 44 | 61 | F | N | 42 | 64 | 91 |     |     |  | N | N | N | Y | N | N | N | N |
| 45 | 26 | F | N | 42 | 58 | 73 | 98  | 216 |  | Y | Y | Y | Y | N | Y | Y | Y |
| 46 | 34 | F | N | 42 | 57 | 70 |     |     |  | Y | Y | Y | Y | N | N | Y | N |
| 47 | 47 | F | N | 41 | 56 | 69 | 97  | 206 |  | N | N | Y | Y | N | N | N | N |
| 48 | 54 | F | N | 42 | 57 | 70 | 98  | 186 |  | Y | N | Y | Y | N | N | N | N |
| 49 | 45 | F | N | 42 | 58 | 73 | 101 | 186 |  | Y | Y | Y | Y | Y | N | Y | Y |
| 50 | 49 | F | N | 42 | 58 | 73 | 101 | 186 |  | Y | Y | Y | Y | Y | Y | N | Y |
| 51 | 49 | M | N | 42 | 58 | 70 | 98  |     |  | Y | Y | Y | Y | N | N | N | Y |
| 52 | 37 | F | N | 45 | 58 | 73 | 109 |     |  | N | N | Y | Y | Y | N | N | Y |
| 53 | 28 | M | N | 34 | 47 | 62 | 90  |     |  | Y | Y | Y | N | N | N | N | Y |
| 54 | 59 | F | N | 43 | 62 | 75 | 106 |     |  | N | Y | Y | Y | Y | N | Y | Y |
| 55 | 58 | F | N | 45 | 58 | 73 | 101 |     |  | N | Y | N | Y | Y | Y | N | N |
| 56 | 55 | M | N | 43 | 55 | 68 | 96  |     |  | Y | N | Y | Y | N | N | N | N |
| 57 | 38 | M | N | 34 | 47 | 62 | 90  | 193 |  | Y | Y | N | N | N | Y | N | Y |
| 58 | 32 | F | N | 45 | 58 | 73 | 101 | 207 |  | N | Y | N | N | N | N | Y | Y |
| 59 | 28 | F | N | 47 | 60 | 75 | 103 | 184 |  | Y | N | Y | N | N | N | N | N |
| 60 | 59 | F | N | 43 | 56 | 71 | 99  |     |  | Y | N | Y | Y | N | N | N | Y |
| 61 | 33 | M | Y | 48 | 63 | 86 |     |     |  | Y | Y | N | N | N | N | N | Y |
| 62 | 51 | M | N | 46 | 61 | 74 | 106 |     |  | Y | Y | Y | N | N | N | N | Y |
| 63 | 44 | F | N | 45 | 60 | 73 |     |     |  | Y | Y | Y | Y | Y | Y | Y | Y |
| 64 | 57 | F | N | 45 | 61 | 76 |     | 182 |  | N | Y | Y | Y | N | N | Y | Y |
| 65 | 49 | F | N | 47 | 62 | 75 | 108 | 202 |  | Y | N | Y | Y | Y | N | N | N |
| 66 | 52 | M | N | 47 | 62 | 75 |     | 202 |  | N | Y | N | Y | N | Y | N | N |
| 67 | 29 | M | N | 57 | 79 | 95 |     |     |  | Y | Y | Y | Y | Y | Y | N | Y |
| 68 | 48 | F | N | 44 | 59 | 72 | 104 |     |  | Y | N | Y | Y | N | Y | N | N |
| 69 | 46 | F | N | 47 | 62 | 75 | 110 | 180 |  | Y | N | Y | Y | Y | N | Y | Y |
| 70 | 45 | F | N | 45 | 60 | 76 |     | 208 |  | N | Y | Y | Y | N | Y | N | Y |
| 71 | 47 | F | N | 61 | 74 | 89 |     | 194 |  | Y | Y | N | N | N | N | N | Y |
| 72 | 42 | F | N | 50 | 63 | 78 |     | 204 |  | N | Y | Y | Y | Y | Y | N | Y |
| 74 | 65 | F | N | 42 | 56 | 68 | 91  | 173 |  | Y | Y | Y | Y | N | N | Y | N |
| 75 | 53 | F | N | 41 | 54 | 69 |     | 196 |  | Y | N | Y | Y | N | N | Y | Y |
| 76 | 50 | M | N | 47 | 60 | 75 |     | 202 |  | Y | Y | Y | N | Y | Y | N | Y |
| 77 | 31 | F | N | 47 | 61 | 75 |     | 202 |  | Y | Y | Y | N | Y | Y | N | Y |

|            |    |   |   |    |    |    |    |     |  |   |   |   |   |   |   |   |   |
|------------|----|---|---|----|----|----|----|-----|--|---|---|---|---|---|---|---|---|
| 78         | 43 | M | N | 40 | 53 | 68 |    | 170 |  | Y | Y | Y | Y | Y | Y | Y | Y |
| 79         | 45 | F | N | 47 | 60 | 75 |    | 199 |  | N | Y | Y | N | Y | Y | N | Y |
| 80         | 29 | F | Y | 49 | 62 | 77 |    |     |  | Y | Y | Y | Y | N | N | Y | Y |
| 81         | 60 | F | N | 51 | 64 | 86 |    | 198 |  | N | Y | Y | Y | N | N | N | Y |
| 82         | 47 | M | N | 31 | 46 | 59 | 87 | 181 |  | N | Y | Y | Y | N | Y | Y | Y |
| 83         | 33 | F | N | 31 | 46 | 59 | 87 | 195 |  | Y | Y | Y | Y | N | N | N | N |
| 84         | 54 | F | N | 54 | 69 | 82 |    | 210 |  | Y | Y | Y | Y | N | N | N | N |
| 85         | 30 | F | N | 31 | 46 | 59 | 87 | 181 |  | N | Y | Y | N | Y | Y | N | N |
| 86         | 22 | M | N | 40 | 55 | 68 | 96 | 190 |  | N | Y | N | Y | N | Y | N | N |
| 87         | 59 | F | N | 29 | 44 | 57 | 85 |     |  | Y | Y | Y | Y | Y | N | N | N |
| 88         | 37 | F | N | 56 | 71 | 84 |    | 204 |  | Y | N | Y | Y | Y | N | Y | N |
| 89         | 59 | F | N | 47 | 62 | 75 |    |     |  | Y | Y | Y | Y | Y | Y | N | N |
| 90         | 33 | F | N | 46 | 61 | 75 |    |     |  | Y | Y | Y | Y | N | Y | N | Y |
| 91         | 59 | F | N | 54 | 69 | 91 |    | 180 |  | Y | Y | Y | Y | N | Y | N | Y |
| 92         | 45 | M | N | 42 | 57 | 70 | 98 | 172 |  | Y | Y | N | Y | N | N | N | Y |
| 93         | 40 | M | N | 58 | 71 | 86 |    | 202 |  | N | Y | Y | Y | Y | N | N | Y |
| 94         | 57 | F | N | 55 | 68 | 83 |    |     |  | N | Y | N | Y | N | Y | N | Y |
| 95         | 49 | F | N | 49 | 68 | 83 |    |     |  | N | N | Y | Y | N | N | N | Y |
| 97         | 62 | F | N | 50 | 63 | 78 |    |     |  | Y | Y | N | Y | Y | N | N | Y |
| 100        | 50 | F | N | 34 | 49 | 62 |    | 174 |  | N | Y | N | N | Y | N | N | Y |
| 101        | 50 | F | N | 39 | 55 | 70 |    | 182 |  | N | N | Y | Y | N | Y | Y | N |
| 102        | 29 | F | N | 58 | 73 | 86 |    | 198 |  | Y | Y | Y | N | Y | Y | N | Y |
| 103        | 34 | F | N | 43 | 58 | 71 |    | 163 |  | N | N | N | Y | N | N | N | Y |
| 104        | 27 | F | N | 38 | 53 | 67 |    | 160 |  | N | N | N | Y | Y | N | N | N |
| 105        | 26 | F | N | 35 | 50 | 63 |    | 177 |  | Y | Y | N | Y | Y | N | N | Y |
| 106        | 51 | F | N | 36 | 49 | 64 |    |     |  | N | N | Y | N | N | N | Y | Y |
| 110        | 44 | F | N | 42 | 55 | 70 |    |     |  | Y | N | Y | N | N | N | Y | Y |
| 111        | 48 | F | N | 61 | 74 | 89 |    |     |  | Y | Y | Y | Y | Y | Y | Y | Y |
| 112        | 29 | F | N | 29 | 42 | 57 |    |     |  | Y | Y | Y | Y | Y | Y | Y | Y |
| LR964-C001 | 38 | F | N |    |    |    |    | 179 |  |   |   |   |   |   |   |   |   |
| LR964-C002 | 55 | F | N |    |    |    |    | 152 |  |   |   |   |   |   |   |   |   |
| LR964-C003 | 42 | F | N |    |    |    |    | 184 |  |   |   |   |   |   |   |   |   |
| LR964-C004 | 60 | F | N |    |    |    |    | 175 |  |   |   |   |   |   |   |   |   |
| LR964-C005 | 46 | F | N |    |    |    |    | 199 |  |   |   |   |   |   |   |   |   |
| LR964-C006 | 39 | M | N |    |    |    |    | 164 |  |   |   |   |   |   |   |   |   |
| LR964-C007 | 28 | F | N |    |    |    |    | 178 |  |   |   |   |   |   |   |   |   |
| LR964-C008 | 57 | F | N |    |    |    |    | 179 |  |   |   |   |   |   |   |   |   |
| LR964-C009 | 53 | F | N |    |    |    |    | 189 |  |   |   |   |   |   |   |   |   |

|            |    |   |   |  |  |  |  |  |  |     |  |  |  |  |  |  |  |
|------------|----|---|---|--|--|--|--|--|--|-----|--|--|--|--|--|--|--|
| LR964-C011 | 26 | F | N |  |  |  |  |  |  | 146 |  |  |  |  |  |  |  |
| LR964-C025 | 32 | F | N |  |  |  |  |  |  | 163 |  |  |  |  |  |  |  |
| LR964-C038 | 41 | M | N |  |  |  |  |  |  | 179 |  |  |  |  |  |  |  |
| LR964-C041 | 44 | M | N |  |  |  |  |  |  | 202 |  |  |  |  |  |  |  |
| LR964-C067 | 20 | M | N |  |  |  |  |  |  | 131 |  |  |  |  |  |  |  |
| LR964-C073 | 35 | F | N |  |  |  |  |  |  | 203 |  |  |  |  |  |  |  |
| LR964-C074 | 52 | F | N |  |  |  |  |  |  | 178 |  |  |  |  |  |  |  |
| LR964-C075 | 53 | F | N |  |  |  |  |  |  | 168 |  |  |  |  |  |  |  |
| LR964-C077 | 40 | F | N |  |  |  |  |  |  | 201 |  |  |  |  |  |  |  |
| LR964-C079 | 28 | F | N |  |  |  |  |  |  | 178 |  |  |  |  |  |  |  |
| LR964-C082 | 31 | F | N |  |  |  |  |  |  | 192 |  |  |  |  |  |  |  |
| LR964-C083 | 24 | F | N |  |  |  |  |  |  | 168 |  |  |  |  |  |  |  |
| LR964-C087 | 31 | F | N |  |  |  |  |  |  | 189 |  |  |  |  |  |  |  |
| LR964-C086 | 56 | F | N |  |  |  |  |  |  | 44  |  |  |  |  |  |  |  |

Study cohort information. Gender and age are shown, along with whether the patient was hospitalized during their illness. Times (days) post-RT-PCR SARS-CoV-2 positive test are provided for each sample at each visit. Patient symptoms at visit 1 are indicated (based on patient answers to a questionnaire). Demographic information of the cohort was not recorded.
